# Supplementary material
Source: PubMed Central journal article supplement (PMC2737562)

Supplemental Figure 1

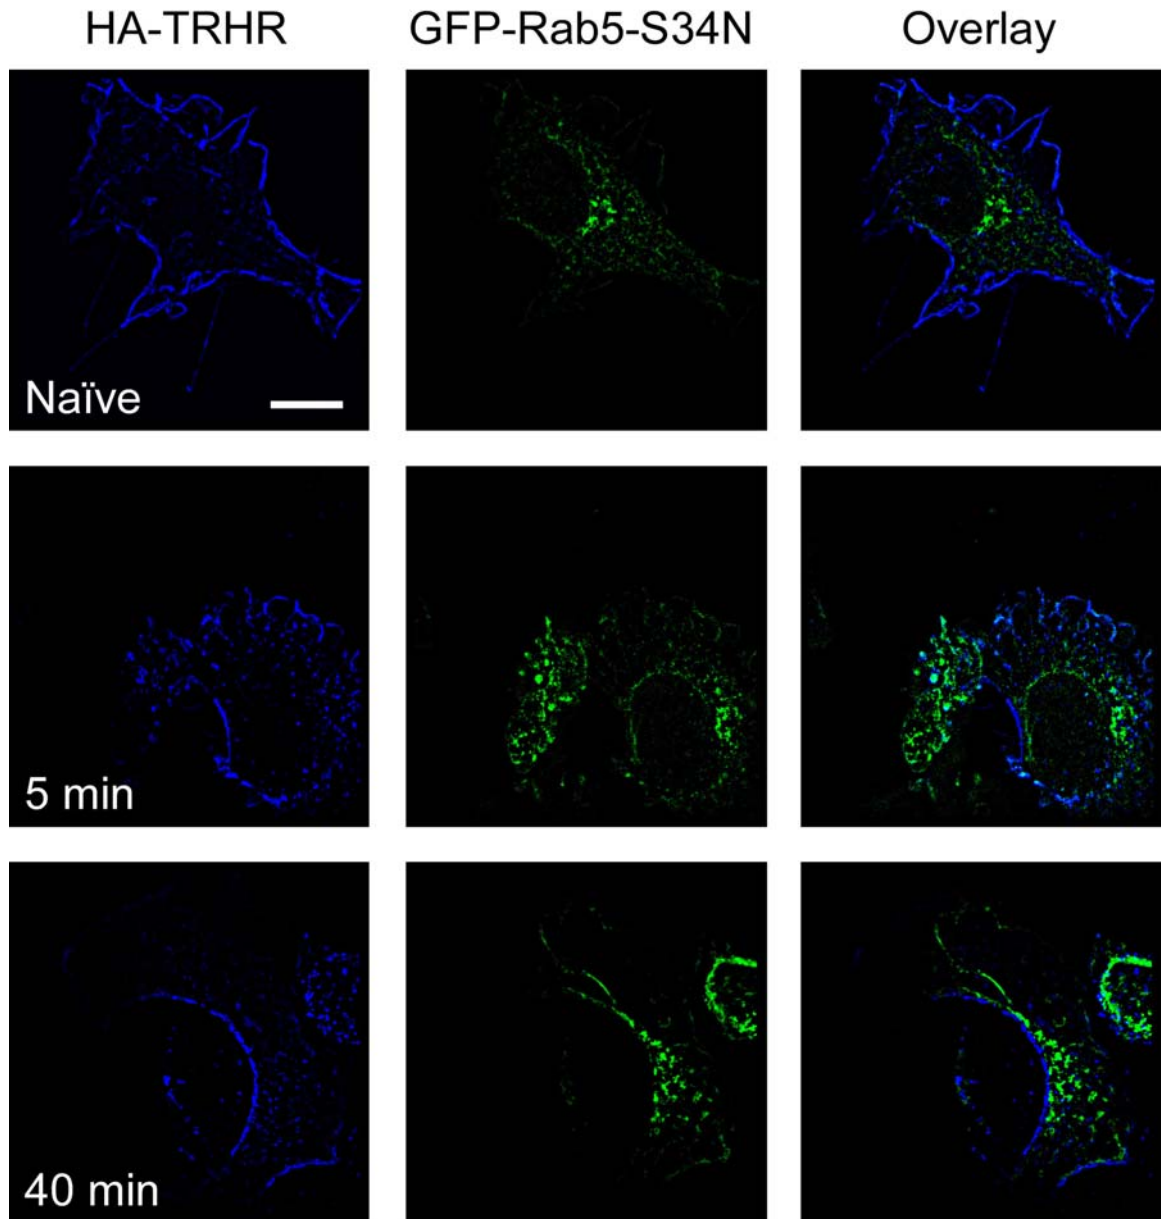

Supplement: me.2009-0119_1.pdf [file me.2009-0119_1.pdf]

Supplemental Figure 2

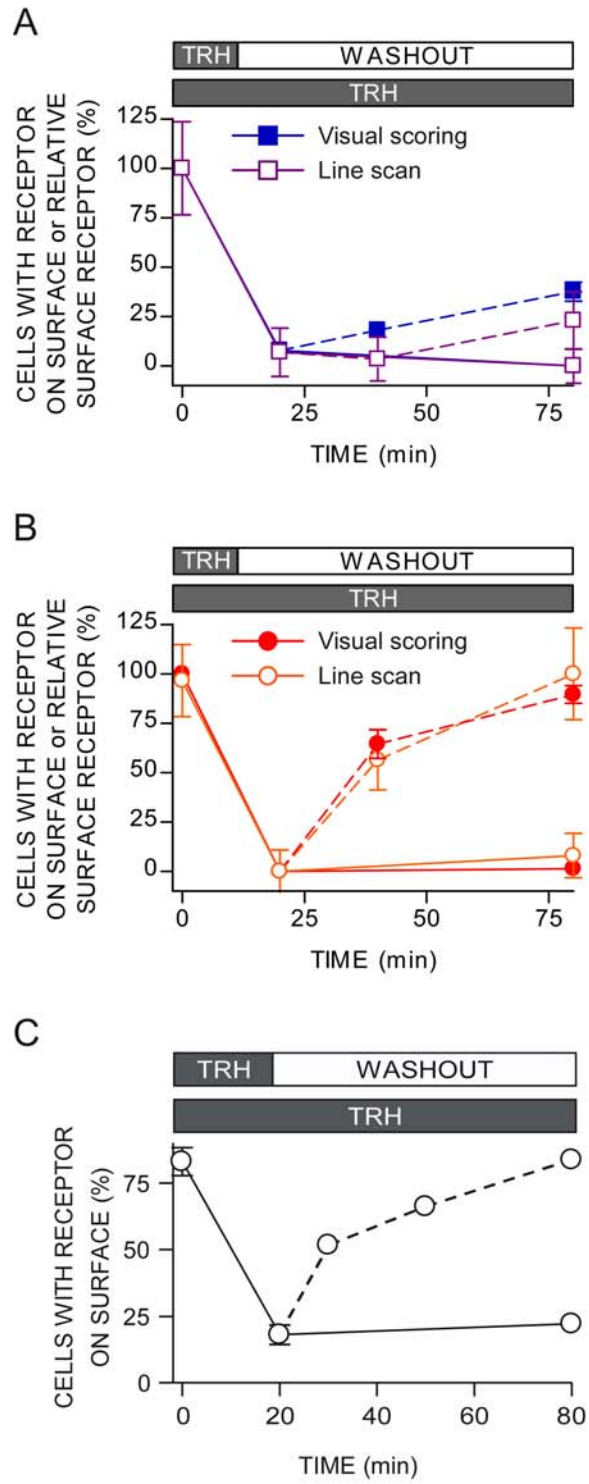

Supplement: me.2009-0119_2.pdf [file me.2009-0119_2.pdf]
